# Supplementary material for: Circulating immune cell landscape in patients who had mild ischaemic stroke
Source: HighWire-hosted journal article supplement (doi:10.1136/svn-2021-001224), 2022-03-09
Supplement: svn-2021-001224supp002_data_supplement.pdf [file svn-2021-001224supp002_data_supplement.pdf]

## Supplementary Table

This is the cluster proportion of PBMCs in controls and stroke patients measured by scRNA-sequencing (supplementary table 1) and flow cytometry (supplementary table 2). Data is shown in a relative percentage and 95% confidential intervals. P values are measured between stroke patients and controls.

**Supplementary Table 1.** Cluster proportion of PBMCs in controls and stroke patients analyzed by scRNA-sequencing.

| Cell type                    | Controls          | Stroke patients   | p value |
|------------------------------|-------------------|-------------------|---------|
| CD14+ monocytes              | 25.0% [18.7-21.3] | 24.0% [12.5-35.5] | 0.624   |
| B cells                      | 13.6% [10.1-17.0] | 14.2% [1.3-27.4]  | 0.086   |
| CD4+ T cells                 | 11.8% [7.1-16.5]  | 14.3% [7.4-21.2]  | 0.806   |
| CD8+ T cells                 | 12.7% [5.8-19.5]  | 12.7% [5.8-19.6]  | 0.935   |
| CD16+ monocytes              | 10.3% [5.1-15.4]  | 8.1% [5.0-11.2]   | 0.744   |
| NK cells                     | 6.2% [5.0-7.4]    | 11.6% [7.7-15.5]  | 0.022   |
| CD14+ monocytes subtype      | 9.4% [3.2-15.6]   | 3.8% [1.7-5.9]    | 0.018   |
| Megakaryocytes               | 6.4% [3.9-8.8]    | 4.8% [2.4-7.2]    | 0.165   |
| Classical dendritic cells    | 3.6% [2.2-5.0]    | 2.8% [1.8-3.8]    | 0.514   |
| Megakaryocytes subtype       | 0.1% [0.0-0.3]    | 3.0% [0.0-0.8]    | 0.209   |
| Plasmacytoid dendritic cells | 1.0% [0.6-1.4]    | 0.8% [0.3-1.2]    | 0.369   |

**Supplementary Table 2.** Cluster proportion of PBMCs in controls and stroke patients analyzed by flow cytometry.

| Cell type                             | Controls          | Stroke patients   | p value |
|---------------------------------------|-------------------|-------------------|---------|
| T cells (total)                       | 43.9% [36.4-51.4] | 35.5% [25.4-45.6] | 0.205   |
| CD4+ T cells                          | 33.1% [25.3-40.1] | 25.2% [16.3-34.0] | 0.153   |
| CD8+ T cells                          | 8.8% [6.0-11.6]   | 2.2% [0.0-4.3]    | 0.004   |
| CD3+/CD56+ cells                      | 3.5% [1.1-5.9]    | 3.5% [1.3-5.7]    | 0.967   |
| NK cells                              | 8.3% [5.9-10.7]   | 15.0% [9.2-20.8]  | 0.025   |
| B cells                               | 12.2% [9.8-14.6]  | 14.6% [1.8-27.3]  | 0.142   |
| Monocytes (total)                     | 25.3% [20.5-30.0] | 19.9% [15.8-24.0] | 0.153   |
| Classical monocytes (CD14++/CD16-)    | 22.7% [18.2-27.2] | 17.2% [13.5-20.8] | 0.102   |
| Intermediate monocytes (CD14++/CD16+) | 1.0% [0.5-1.5]    | 1.0% [0.4-1.6]    | 1.000   |
| Nonclassical monocytes (CD14+/CD16++) | 0.4% [0.04-0.08]  | 0.7% [0.2-1.2]    | 0.497   |
